# Supplementary material for: Dietary practices in methylmalonic acidaemia: a European survey
Source: publisher site journal article supplement (doi:10.1515/jpem-2019-0277), 2019-12-16
Supplement: Supplementary file 1 [file OA questionnaire.pdf › Supplement/OA questionnaire.pdf]

Organic  
Acidaemias  
Questionnaire  
for SSIEM 2014

We would like to try and find out more about feeding practices in children and adults with organic acidaemias throughout Europe and neighbouring countries. We are specifically looking at children with propionic, methylmalonic and isovaleric acidaemia.

We would like to present these findings at the SSIEM meeting in Innsbruck. If we have enough information, we would like to consider publication of this data. Anyone who contributes data will be included as an author. We would be very grateful if you would take time to complete the following questions by **2<sup>nd</sup> August, 2014**.

Please do not hesitate to contact us if you do need any further explanation. Thank you and Best wishes

# Name and country of metabolic centre

-----

- Name of Dietitian to be included in the author list (this has to be the person who has collated the data for each centre or played a major role in writing the paper). We have to explain the role of each author to the journal
- Name of other dietitians to be acknowledged at the end of the paper

# How many patients are on a prescribed protein restriction with organic acidaemias?

| Condition                                                                | Total<br>Numbers of<br>patients | Aged<br>< 1y | Aged<br>1-10y | Aged<br>11-16y | Aged<br>>16y |
|--------------------------------------------------------------------------|---------------------------------|--------------|---------------|----------------|--------------|
| <b>Propionic<br/>acidaemia</b>                                           | Neonatal<br>diagnosis           |              |               |                |              |
|                                                                          | Late diagnosis                  |              |               |                |              |
| <b>Methylmalonic<br/>acidaemia –<br/>Vitamin B12<br/>responsive</b>      | Neonatal<br>diagnosis           |              |               |                |              |
|                                                                          | Late diagnosis                  |              |               |                |              |
| <b>Methylmalonic<br/>acidaemia –<br/>Vitamin B12 non-<br/>responsive</b> | Neonatal<br>diagnosis           |              |               |                |              |
|                                                                          | Late diagnosis                  |              |               |                |              |
| <b>Isovaleric<br/>acidaemia</b>                                          | Neonatal<br>diagnosis           |              |               |                |              |
|                                                                          | Late diagnosis                  |              |               |                |              |

Please only include patients who have been prescribed protein restriction (even if compliance is poor).

*Please indicate how many patients are diagnosed early (i.e. less than 30 days of age) and how many post 30 days (late diagnosis). If age of diagnosis is unknown please indicate this.*

Please calculate the total protein (g/kg/day) you have prescribed for your patients on protein restriction with organic acidaemias for each of the age bands

| Condition                                                  | Aged<br>0-6 m | Aged<br>6-12 m | Aged<br>1-10y | Aged<br>11-16y | Aged<br>>16y |
|------------------------------------------------------------|---------------|----------------|---------------|----------------|--------------|
| Propionic acidaemia                                        |               |                |               |                |              |
| Methylmalonic<br>acidaemia – Vitamin<br>B12 responsive     |               |                |               |                |              |
| Methylmalonic<br>acidaemia – Vitamin<br>B12 non-responsive |               |                |               |                |              |
| Isovaleric acidaemia                                       |               |                |               |                |              |

Total protein includes natural protein and protein equivalent from precursor-free L-amino acid supplements e.g. XMTVI Anamix infant

*NB: precursor-free L-amino acid supplements = medical foods*

How many of your patients have precursor -free amino acid supplements (e.g. XMTVI Anamix infant) in the following age groups

| Condition                                                       | Aged<br>0-6 m | Aged<br>6-12 m | Aged<br>1-10y | Aged<br>11-16y | Aged<br>>16y |
|-----------------------------------------------------------------|---------------|----------------|---------------|----------------|--------------|
| Propionic<br>acidaemia                                          |               |                |               |                |              |
| Methylmalonic<br>acidaemia –<br>Vitamin B12<br>responsive       |               |                |               |                |              |
| Methylmalonic<br>acidaemia –<br>Vitamin B12 non -<br>responsive |               |                |               |                |              |
| Isovaleric<br>acidaemia                                         |               |                |               |                |              |

*NB: precursor-free L-amino acid supplements = medical foods*

Please calculate the dose of precursor-free amino acid supplements (e.g XMTVI Anamix Infant) used **for each of the age bands**. Please give this in both g/kg/daily of protein equivalent and as a percentage of total protein intake.

| Condition                                                  | Aged<br>0-6 m | Aged<br>6-12 m | Aged<br>1-10y | Aged<br>11-16y | Aged<br>>16y |
|------------------------------------------------------------|---------------|----------------|---------------|----------------|--------------|
| Propionic acidaemia                                        |               |                |               |                |              |
| Methylmalonic<br>acidaemia – Vitamin B12<br>responsive     |               |                |               |                |              |
| Methylmalonic<br>acidaemia – Vitamin B12<br>non-responsive |               |                |               |                |              |
| Isovaleric acidaemia                                       |               |                |               |                |              |

*NB: precursor-free L-amino acid supplements = medical foods*

# Prescription of precursor-free amino acids

- Do you give precursor-free L-amino acids in addition to your usual protein allowance or do they replace natural protein?
- How do you usually give the precursor-free L-amino acids in divided doses, with natural protein, mixed with what ?

*NB: precursor-free L-amino acid supplements = medical foods*



# Type of precursor-free amino acids (medical foods)

- Which is your preferred type of amino acid supplement and why?
  - with added carbohydrate/fat/vitamins and minerals
  - with added carbohydrate/vitamins and minerals
  - L-amino acids only

*Comments:*

- How do you decide how much protein to give your patients e.g. WHO criteria, ammonia, blood gases, lactate etc?
- Do you allocate patients with mild or severe organic acidaemias the same or different protein allowances?
- Who decides within your IMD team how much protein to allocate patients?

- Do you recommend that animal protein is eaten to make up protein allowance?

Yes

No

Don't know

- Do you restrict odd-chain fatty acids in the diet

Yes

No

Don't know

- How many of your patients use special low protein foods?

- How many of your patients use low protein milk replacements e.g. Sno Pro or Pro-zero?

# Adult patients only

- Please state the range of protein you would prescribe in g/day for your patients?
- Are there any differences for any disorder?

# How many patients are on tube feeds for feeding?

| Condition                                                               |                     | Aged<br>0-6 m | Aged<br>6-12 m | Aged<br>1-10y | Aged<br>11-16y | Aged<br>>16y |
|-------------------------------------------------------------------------|---------------------|---------------|----------------|---------------|----------------|--------------|
| <b>Propionic<br/>acidaemia</b>                                          | Number of patients  |               |                |               |                |              |
|                                                                         | % of total patients |               |                |               |                |              |
| <b>Methylmalonic<br/>acidaemia –<br/>Vitamin B12<br/>responsive</b>     | Number of patients  |               |                |               |                |              |
|                                                                         | % of total patients |               |                |               |                |              |
| <b>Methylmalonic<br/>acidaemia –<br/>Vitamin B12<br/>non-responsive</b> | Number of patients  |               |                |               |                |              |
|                                                                         | % of total patients |               |                |               |                |              |
| <b>Isovaleric<br/>acidaemia</b>                                         | Number of patients  |               |                |               |                |              |
|                                                                         | % of total patients |               |                |               |                |              |

# How many patients are on overnight tube feeds only?

| Condition                                                               |                     | Aged<br>0-6 m | Aged<br>6-12 m | Aged<br>1-10y | Aged<br>11-16y | Aged<br>>16y |
|-------------------------------------------------------------------------|---------------------|---------------|----------------|---------------|----------------|--------------|
| <b>Propionic<br/>acidaemia</b>                                          | Number of patients  |               |                |               |                |              |
|                                                                         | % of total patients |               |                |               |                |              |
| <b>Methylmalonic<br/>acidaemia –<br/>Vitamin B12<br/>responsive</b>     | Number of patients  |               |                |               |                |              |
|                                                                         | % of total patients |               |                |               |                |              |
| <b>Methylmalonic<br/>acidaemia –<br/>Vitamin B12<br/>non-responsive</b> | Number of patients  |               |                |               |                |              |
|                                                                         | % of total patients |               |                |               |                |              |
| <b>Isovaleric<br/>acidaemia</b>                                         | Number of patients  |               |                |               |                |              |
|                                                                         | % of total patients |               |                |               |                |              |

# How many patients are on tube feeds for drugs only?

| Condition                                                                | Aged<br>0-6 m | Aged<br>6-12 m | Aged<br>1-10y | Aged<br>11-16y | Aged<br>>16y |
|--------------------------------------------------------------------------|---------------|----------------|---------------|----------------|--------------|
| Propionic<br>acidaemia                                                   |               |                |               |                |              |
| Methylmalonic<br>acidaemia – Vitamin<br>B12 responsive                   |               |                |               |                |              |
| Methylmalonic<br>acidaemia – Vitamin<br>B12 responsive non<br>responsive |               |                |               |                |              |
| Isovaleric<br>acidaemia                                                  |               |                |               |                |              |

# Please indicate the number of patients on nasogastric or gastrostomy feeding tubes in each age group

| Condition                                                                | Aged<br>0-6 m              | Aged<br>6-12 m             | Aged<br>1-10y              | Aged<br>11-16y             | Aged<br>>16y               |
|--------------------------------------------------------------------------|----------------------------|----------------------------|----------------------------|----------------------------|----------------------------|
| <b>Propionic<br/>acidaemia</b>                                           | nasogastric<br>gastrostomy | nasogastric<br>gastrostomy | nasogastric<br>gastrostomy | nasogastric<br>gastrostomy | nasogastric<br>Gastrostomy |
| <b>Methylmalonic<br/>acidaemia –<br/>Vitamin B12<br/>responsive</b>      | nasogastric<br>gastrostomy | nasogastric<br>gastrostomy | nasogastric<br>gastrostomy | nasogastric<br>gastrostomy | nasogastric<br>gastrostomy |
| <b>Methylmalonic<br/>acidaemia –<br/>Vitamin B12 non-<br/>responsive</b> | nasogastric<br>gastrostomy | nasogastric<br>gastrostomy | nasogastric<br>gastrostomy | nasogastric<br>gastrostomy | nasogastric<br>gastrostomy |
| <b>Isovaleric<br/>acidaemia</b>                                          | nasogastric<br>gastrostomy | nasogastric<br>gastrostomy | nasogastric<br>gastrostomy | nasogastric<br>gastrostomy | nasogastric<br>gastrostomy |



# Please tick or list the reasons why your patients are tube fed

| Criteria                                                   | Yes | No |
|------------------------------------------------------------|-----|----|
| Prevention of fasting                                      |     |    |
| Food refusal                                               |     |    |
| Unsafe swallow                                             |     |    |
| Inadequate energy intake                                   |     |    |
| Poor nutritional quality of diet                           |     |    |
| To administer precursor-free amino acids                   |     |    |
| Mechanical feeding difficulties due to neurological damage |     |    |
| To administer emergency feeds only                         |     |    |
| Other                                                      |     |    |

Please list all ingredients that you would add to tube feeds for patients with organic acidaemias in the following age categories

| Condition                  | Infants<br>Aged 0-12m | Children Aged<br>1-10y | Teenagers<br>aged<br>11-16y | Adults aged<br>>16y |
|----------------------------|-----------------------|------------------------|-----------------------------|---------------------|
| Propionic acidaemia        |                       |                        |                             |                     |
| Methylmalonic<br>acidaemia |                       |                        |                             |                     |
| Isovaleric acidaemia       |                       |                        |                             |                     |

How many patients are **currently** taking prescribed energy supplements (oral supplements only)?

| Condition                                                      | Aged<br>0-6 m | Aged<br>6-12 m | Aged<br>1-10y | Aged<br>11-16y | Aged<br>>16y |
|----------------------------------------------------------------|---------------|----------------|---------------|----------------|--------------|
| Propionic<br>acidaemia                                         |               |                |               |                |              |
| Methylmalonic<br>acidaemia –<br>Vitamin B12<br>responsive      |               |                |               |                |              |
| Methylmalonic<br>acidaemia –<br>Vitamin B12 non-<br>responsive |               |                |               |                |              |
| Isovaleric<br>acidaemia                                        |               |                |               |                |              |

# In which situations would you **routinely** prescribe vitamin and mineral supplements?

| Situation                                                                                               | Yes | No |
|---------------------------------------------------------------------------------------------------------|-----|----|
| To all patients on low protein diets                                                                    |     |    |
| To patients only if they have a poor dietary intake on dietary assessment                               |     |    |
| To patients only if they have a poor biochemical status                                                 |     |    |
| Other: please state                                                                                     |     |    |
|                                                                                                         |     |    |
| What type of supplements do you prescribe?                                                              |     |    |
| Comprehensive vitamin and mineral supplements e.g. Paeditaric seravit, Phlexyvits, Fruitivits           |     |    |
| Partial vitamin and mineral supplements e.g. a multivitamin + iron and zinc purchased from retail shops |     |    |
| Single vitamin /mineral supplements according to dietary assessment e.g. calcium                        |     |    |
| Single vitamin /mineral supplements according to biochemistry e.g. iron or vitamin B12                  |     |    |
| Other: please state                                                                                     |     |    |

Would you **routinely** prescribe any of the following fatty acid supplements?

| Fatty acid supplements                                                        | Yes | No |
|-------------------------------------------------------------------------------|-----|----|
| Essential fatty acids (linoleic and $\alpha$ -linolenic acid) e.g. walnut oil |     |    |
| Linoleic acid only                                                            |     |    |
| $\alpha$ -linolenic acid only                                                 |     |    |
| DHA ( $\pm$ EPA) only                                                         |     |    |
| DHA ( $\pm$ EPA) + Arachidonic acid                                           |     |    |
| Other: please state                                                           |     |    |
|                                                                               |     |    |

Please indicate the concentration of carbohydrate and other type of ingredients you may routinely add to an emergency feed for the following age groups?

| Ingredients                                                      | Aged<br>0-6 m | Aged<br>6-12 m | Aged 1-2y | Aged<br>3-10y | Aged<br>>10y |
|------------------------------------------------------------------|---------------|----------------|-----------|---------------|--------------|
| 10% glucose polymer                                              |               |                |           |               |              |
| 15% glucose polymer                                              |               |                |           |               |              |
| 20% glucose polymer                                              |               |                |           |               |              |
| 25% glucose polymer                                              |               |                |           |               |              |
| Long chain fat emulsion                                          |               |                |           |               |              |
| MCT fat emulsion                                                 |               |                |           |               |              |
| Precursor-free amino acid supplements (e.g. XMTVI Anamix infant) |               |                |           |               |              |
| Electrolytes e.g. sodium, potassium                              |               |                |           |               |              |
| Other. Please state                                              |               |                |           |               |              |

# Which nutritional measurements do you **routinely** undertake and how often do you do these on average?

| Parameter                    | <i>Please circle which of the following measures you assess</i>              | <i>Frequency. Please circle the answer that is closest to your practice.</i> |
|------------------------------|------------------------------------------------------------------------------|------------------------------------------------------------------------------|
| Growth                       | length/height, head circumference, weight, BMI                               | Weekly, monthly, six monthly, annually, rarely, never                        |
| Nutrient adequacy            | 3 day diet diary                                                             | Weekly, monthly, six monthly, annually, rarely, never                        |
| Protein status               | total protein, albumin, pre-albumin                                          | Weekly, monthly, six monthly, annually, rarely, never                        |
| Plasma amino acids           | quantitative amino acid profile                                              | Weekly, monthly, six monthly, annually, rarely, never                        |
| Iron status indices          | haemoglobin, haematocrit, ferritin, complete blood count                     | Weekly, monthly, six monthly, annually, rarely, never                        |
| Essential fatty acid profile | Plasma essential fatty acids; erythrocyte essential fatty acids              | Weekly, monthly, six monthly, annually, rarely, never                        |
| Trace element status         | Plasma selenium, glutathionine peroxidase, zinc                              | Weekly, monthly, six monthly, annually, rarely, never                        |
| Vitamins                     | Vitamin B12, vitamin D, vitamin A, vitamin E, folate                         | Weekly, monthly, six monthly, annually, rarely, never                        |
| Metabolic control            | Ammonia/blood gases/lactate/plasma or urine MMA/ ketonuria/ plasma carnitine | Weekly, monthly, six monthly, annually, rarely, never                        |
| Other                        |                                                                              | Weekly, monthly, six monthly, annually, rarely, never                        |

# Brief/basic information on main drug treatment policy from your unit (this is for background information only for the paper)

| Does your unit commonly prescribe the following drugs in organic acidaemais | Propionic acidaemia | Methylmalonic acidaemia – Vitamin B12 responsive | Methylmalonic acidaemia – Vitamin B12 responsive non responsive | Isovaleric acidaemia |
|-----------------------------------------------------------------------------|---------------------|--------------------------------------------------|-----------------------------------------------------------------|----------------------|
| Carnitine                                                                   |                     |                                                  |                                                                 |                      |
| Ammonia scavenger drugs e.g. Sodium benzoate                                |                     |                                                  |                                                                 |                      |
| Glycine                                                                     |                     |                                                  |                                                                 |                      |
| Antibiotics e.g. metronidazole                                              |                     |                                                  |                                                                 |                      |
| Laxatives for constipation                                                  |                     |                                                  |                                                                 |                      |
